# Supplementary material
Source: publisher site journal article supplement (https://www.dovepress.com/article/409713)
Supplement: Supplementary file 1 [file get_supplementary_file.php]

**Supplemental Table 1**

| **Control no.** | **Sex** | **Age (years)** | **FPG (mg/dl)** | **Average HbA1c (%)** |
| --- | --- | --- | --- | --- |
| 1 | Male | 51 | 87 | ND |
| 2 | Female | 56 | 78 | 5.6 |
| 3 | Female | 52 | 84 | ND |
| 4 | Female | 56 | 88 | 5.6 |
| 5 | Female | 51 | 86 | 5.5 |
| 6 | Male | 52 | 82 | 5.3 |
| 7 | Female | 49 | 84 | 5.5 |
| 8 | Female | 51 | 86 | 5.5 |
| 9 | Male | 52 | 97 | 5.3 |
| 10 | Female | 52 | 92 | 5.3 |
| 11 | Male | 50 | 97 | 5.5 |
| 12 | Male | 54 | 85 | 4.8 |
| 13 | Male | 56 | 82 | ND |
| 14 | Male | 53 | 81 | 5.5 |
| 15 | Male | 50 | 84 | 5.3 |
| 16 | Female | 53 | 77 | 5.4 |

ND No data; FPG fasting plasma glucose level

Average HbA1c (%) was presented in supplemental Table 1
